# Supplementary material
Source: publisher figshare collection journal article supplement (https://acs.figshare.com/ndownloader/files/21156246)
Supplement: Supplementary file 1 [file 21156246]

## Supporting information

### 1. Supporting Materials and Methods

*1.1 Sample preparation of Immunoblot analysis of Cr metabolism-related protein.*<sup>1-3</sup> Aliquots of iWAT were homogenized in 1 mM EDTA, 10 mM Tris, and 0.25 M sucrose (pH 7.5) with protease inhibitor cocktail (cComplete, Mini, Roche Diagnostics K.K, Tokyo, Japan). After centrifugation at 15,000 g for 10 min at 4°C, the supernatant was collected, and then added detergents to a final concentration of 1% Triton X-100, 1% NP-40, and 0.1% SDS followed by incubation for 30 min. The supernatant was centrifuged at 15,000 g, for 50 min at 4°C, and then sheared eight times with a 26G needle. The protein concentration of the obtained supernatant was determined using a Protein Assay System (Bio-Rad, Richmond, CA, USA) with bovine  $\gamma$ -globulin employed as a standard. Aliquots of the supernatant were treated with Laemmli sample buffer for 5 min at 100°C, and stored at -80°C until use.

*1.2 H&E staining and immunostaining.*<sup>2,3</sup> Adipose tissues were fixed in 4% paraformaldehyde for 24 h at 4°C. Then the tissues were embedded in paraffin and cut into slices for UCP1 (5- $\mu$ m thick) immunostaining, and deparaffinized and rehydrated using xylene, ethanol, and water. Adipose tissue sections were stained with H&E (both from Sakura Finetek Japan, Tokyo, Japan) or UCP1 immunostained. For immunohistochemistry, slides were submerged in 0.1 M sodium citrate (pH 6.0) and heated to 100°C for 15 min in a laboratory microwave (500 W). Slides were incubated with 0.3% hydrogen peroxide for 30 min to block endogenous peroxidase, and 2.5% normal horse serum (included in kit) for 20 min at room temperature. Slides were then incubated with anti-UCP1 antibody (1:500) for 16 h at 4°C, and with anti-rabbit IgG (included in kit) for 30 min at room temperature. Labeling was visualized with 3, 3'-diaminobenzidine (DAB) as the chromogen using ImmPress kit and ImmImpact DAB peroxidase substrate kit (Vector Laboratories, Burlingame, CA) according to the manufacturer's directions. Then, sections were counterstained with hematoxylin.

## 2. Supporting Figures

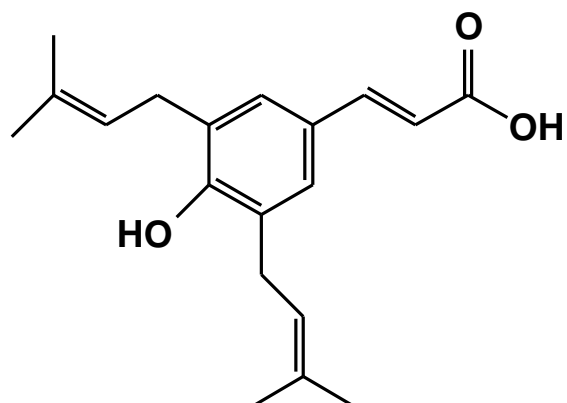

**Figure S1.** Chemical structure of ArtC.

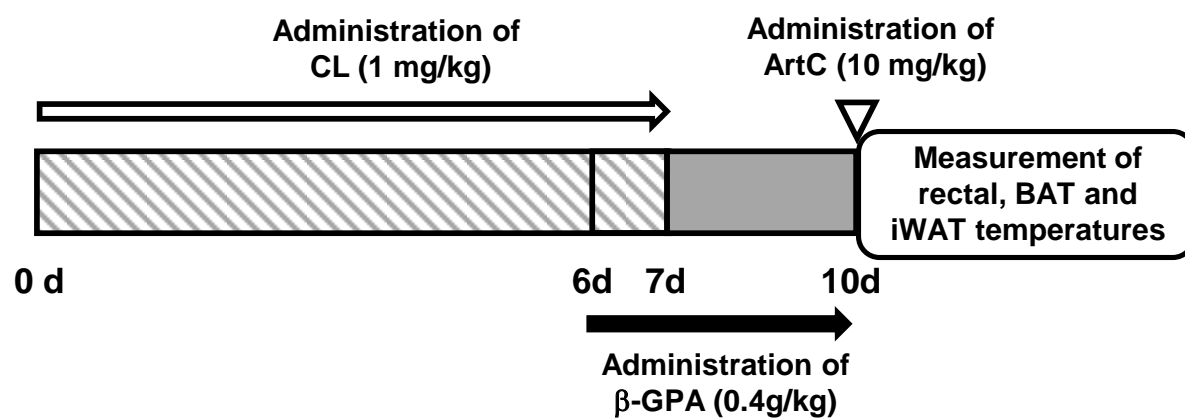

**Figure S2.** Experimental design of the measurement of rectal, BAT and iWAT temperatures after a single administration of ArtC and Cr metabolism inhibitor in mice.

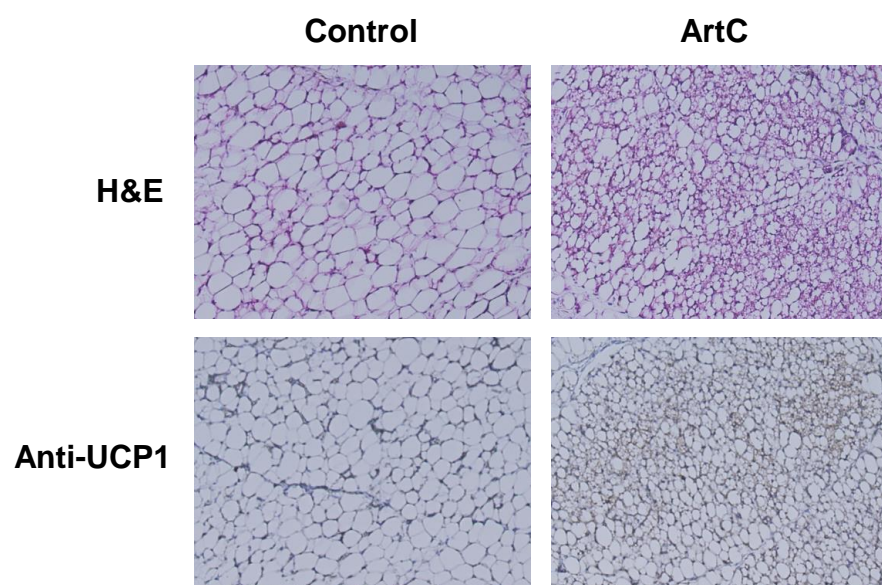

**Figure S3.** Representative images of H&E and immunohistochemical staining of UCP1 in sections of iWAT from mice treated for 28 days with either vehicle (control) or ArtC (10 mg/kg).

### 3. Supporting references

- 1 Lau, P.; Tuong, Z. K.; Wang, S. C.; Fitzsimmons, R. L.; Joel M. Goode, J. M.; Thomas, G. P.; Cowin, G. J.; Pearen, M. A.; Mardon, K.; Stow, J. L.; Muscat, G. E. O. Ror $\alpha$  deficiency and decreased adiposity are associated with induction of thermogenic gene expression in subcutaneous white adipose and brown adipose tissue. *Am. J. Physiol. Endocrinol. Metab.* **2015**, *308*, E159–E171.
- 2 Nishikawa, S.; Aoyama, H.; Kamiya, M.; Higuchi, J.; Kato, A.; Soga, M.; Kawai, T.; Yoshimura, K.; Kumazawa, S.; Tsuda, T. Artepillin C, a typical Brazilian propolis-derived component, induces brown-like adipocyte formation in C3H10T1/2 cells, primary inguinal white adipose tissue-derived adipocytes, and Mice. *PLoS One* **2016**, *11*, e0162512.
- 3 Nishikawa, S.; Kamiya, M.; Aoyama, H.; Nomura, M.; Hyodo, T.; Ozeki, A.; Lee, H.; Takahashi, T.; Imaizumi, A.; Tsuda, T. Highly dispersible and bioavailable curcumin but not native curcumin induces brown-like adipocyte formation in Mice. *Mol. Nutr. Food Res.* **2018**, *62*, 1700731.
